# Supplementary material
Source: PubMed Central journal article supplement (PMC8820005)
Supplement: NIHMS1770985-supplement-Suppl_Table_1-3.pdf [file NIHMS1770985-supplement-Suppl_Table_1-3.pdf]

**Supplementary methods table 1. Strains used on this study**

| Strain                                                           | Relevant genotype                                                                                                                              | Description                                                                                                                                                                                     | Source or reference |
|------------------------------------------------------------------|------------------------------------------------------------------------------------------------------------------------------------------------|-------------------------------------------------------------------------------------------------------------------------------------------------------------------------------------------------|---------------------|
| <i>S. epidermidis</i> RP62a                                      | <i>crispr</i> <sup>+</sup> , neomycin <sup>R</sup> , erythromycin <sup>R</sup>                                                                 | Used as the wild type <i>S. epidermidis</i> strain with a functional native type III-A CRISPR-Cas system                                                                                        | 1                   |
| <i>S. epidermidis</i> LAM104                                     | $\Delta$ <i>crispr</i> , neomycin <sup>R</sup> , erythromycin <sup>R</sup>                                                                     | Isogenic strain of <i>S. epidermidis</i> RP62a with a deletion of the CRISPR spacer array.                                                                                                      | 2                   |
| <i>S. aureus</i> TB4 pWJ245 (gp14)                               | <i>crispr</i> <sup>+</sup>                                                                                                                     | <i>S. aureus</i> TB4 transformed with a plasmid carrying the type III-A CRISPR-Cas system of <i>S. epidermidis</i> RP62a with a targeting spacer towards the gp14 gene of $\phi$ NM1 $\gamma$ 6 | This study          |
| <i>S. aureus</i> TB4 pGG-Bsal                                    | $\Delta$ spacer                                                                                                                                | <i>S. aureus</i> TB4 transformed with a plasmid carrying the type III-A CRISPR-Cas system of <i>S. epidermidis</i> RP62a with non-targeting spacer                                              | This study          |
| <i>S. aureus</i> TB4 pWJ248 (gp14, dCsm3/dCsm6)                  | <i>crispr</i> <sup>+</sup> , <i>csm3</i> (D32A), <i>csm6</i> (R364A,H369A)                                                                     | <i>S. aureus</i> TB4 pWJ245, but with catalytically inactive Csm3 and Csm6                                                                                                                      | This study          |
| <i>S. aureus</i> TB4 pJTR122 (gp14, dHD/dCsm3)                   | <i>crispr</i> <sup>+</sup> , <i>cas10</i> (H14A, D15A), <i>csm3</i> (D32A)                                                                     | <i>S. aureus</i> TB4 pWJ245, but with catalytically inactive HD domain of Cas10                                                                                                                 | This study          |
| <i>S. aureus</i> JAV6 pWJ245 (gp14, <i>lexA</i> K168A)           | <i>crispr</i> <sup>+</sup> , <i>lexA</i> K168A                                                                                                 | SOS-deficient strain of <i>S. aureus</i> TB4 strain with pWJ245                                                                                                                                 | This study          |
| <i>S. aureus</i> TB4 pWJ191 (gp43)                               | <i>crispr</i> <sup>+</sup>                                                                                                                     | <i>S. aureus</i> TB4 transformed with a plasmid carrying the type III-A CRISPR-Cas system of <i>S. epidermidis</i> RP62a with a targeting spacer towards the gp43 gene of $\phi$ NM1 $\gamma$ 6 | This study          |
| <i>S. aureus</i> TB4 pJTR109 (gp43, dHD)                         | <i>crispr</i> <sup>+</sup> , <i>cas10</i> (H14A, D15A)                                                                                         | <i>S. aureus</i> TB4 pWJ191, but with catalytically inactive HD domain of Cas10                                                                                                                 | This study          |
| <i>S. aureus</i> RN4220 pWJ242 (gp43, dCsm3/dCsm6), pJTR162      | <i>crispr</i> <sup>+</sup> , <i>csm3</i> (D32A), <i>csm6</i> (R364A,H369A), P <sub>tet</sub> <sup>-</sup> Target                               | <i>S. aureus</i> RN4220 co-transformed with a dCsm3/dCsm6 type III-A CRISPR-Cas system and an inducible target plasmid                                                                          | This study          |
| <i>S. aureus</i> RN4220 pWJ242 (gp43, dCsm3/dCsm6), pWJ153       | <i>crispr</i> <sup>+</sup> , <i>csm3</i> (D32A), <i>csm6</i> (R364A,H369A), P <sub>tet</sub> <sup>-</sup> NonTarget                            | <i>S. aureus</i> RN4220 co-transformed with a dCsm3/dCsm6 type III-A CRISPR-Cas system and an inducible plasmid lacking the target sequence                                                     | This study          |
| <i>S. aureus</i> RN4220 pJTR127 (gp43, dHD/dCsm3/dCsm6), pJTR162 | <i>crispr</i> <sup>+</sup> , <i>cas10</i> (H14A, D15A), <i>csm3</i> (D32A), <i>csm6</i> (R364A,H369A), P <sub>tet</sub> <sup>-</sup> Target    | <i>S. aureus</i> RN4220 co-transformed with a dHD/dCsm3/dCsm6 type III-A CRISPR-Cas system and an inducible target plasmid                                                                      | This study          |
| <i>S. aureus</i> RN4220 pJTR127 (gp43, dHD/dCsm3/dCsm6), pWJ153  | <i>crispr</i> <sup>+</sup> , <i>cas10</i> (H14A, D15A), <i>csm3</i> (D32A), <i>csm6</i> (R364A,H369A), P <sub>tet</sub> <sup>-</sup> NonTarget | <i>S. aureus</i> RN4220 co-transformed with a dHD/dCsm3/dCsm6 type III-A CRISPR-Cas system and an inducible plasmid lacking the target sequence                                                 | This study          |
| <i>S. aureus</i> TB4 pDVB51 (pSauCas9)                           | <i>crispr</i> <sup>+</sup>                                                                                                                     | <i>S. aureus</i> TB4 transformed with a plasmid carrying the type II-A CRISPR-Cas system                                                                                                        | This study          |

|                                                               |                                                |                                                                                              |            |
|---------------------------------------------------------------|------------------------------------------------|----------------------------------------------------------------------------------------------|------------|
|                                                               |                                                | from <i>S. aureus</i> , with a spacer targeting $\phi$ NM1 $\gamma$ 6                        |            |
| <i>S. aureus</i> TB4 pWJ245, pAV22 (gp14)                     | <i>crispr</i> <sup>+</sup>                     | <i>S. aureus</i> TB4 transformed pWJ245 and the SOS reporter plasmid                         | This study |
| <i>S. aureus</i> JAV6 pWJ245, pAV22 (gp14, <i>lexA</i> K168A) | <i>crispr</i> <sup>+</sup> , <i>lexA</i> K168A | SOS-deficient strain of <i>S. aureus</i> TB4 strain with pWJ245 and the SOS reporter plasmid | This study |

## References

- 1 Gill, S. R. *et al.* Insights on evolution of virulence and resistance from the complete genome analysis of an early methicillin-resistant *Staphylococcus aureus* strain and a biofilm-producing methicillin-resistant *Staphylococcus epidermidis* strain. *J. Bacteriol.* **187**, 2426-2438.
- 2 Marraffini, L. A. & Sontheimer, E. J. CRISPR interference limits horizontal gene transfer in staphylococci by targeting DNA. *Science* **322**, 1843-1845.

**Supplementary methods table 2. Oligos used in this study**

| Plasmid     | Description                                                                                                     | Sequence                                                    |
|-------------|-----------------------------------------------------------------------------------------------------------------|-------------------------------------------------------------|
| CYM-Pm128   | Forward primer to amplify the <i>rpoB</i> locus from the <i>S. aureus</i> genome                                | CTTGTCCTCCGGTAACTAGTAATTAATATGCTTATGGTATTTAGCTAAAAGC        |
| CYM-Pm129   | Reverse primer to amplify the <i>rpoB</i> locus from the <i>S. aureus</i> genome                                | TGCGAGCTAGCATCTGCAGTTTAAATCAGTAACCTCTTTTGTGTTTCAGGAGCATC    |
| CYM-Pm733   | Forward primer to amplify the spacer array of the type III-A CRISPR-Cas locus of <i>S. epidermidis</i>          | ATCATATAATCTTGTACTAGTGATTGTC                                |
| CYM-Pm734   | Reverse primer to amplify spacer array of the type III-A CRISPR-Cas locus of <i>S. epidermidis</i>              | TTTTTCCATCCCCTAGAAATTAATCAATGCG                             |
| CYM-MWS51   | Sequencing adapter oligo from Kennedy et al. <i>Nature Protocols</i> . 2014                                     | AATGATACGGCGACCACCGAGATCTACACTCTTCCCTACACGACGCTCTTCCGATCT   |
| CYM-MWS55   | Sequencing adapter oligo with randomized barcodes from Kennedy et al. <i>Nature Protocols</i> . 2014            | TCTTCTACAGTCANNNNNNNNNNNNAGATCGGAAGAGCACACGTCTGAACTCCAGTCAC |
| CYM-MWS13   | Forward primer to amplify adaptor-ligated genomic fragments, from Kennedy et al. <i>Nature Protocols</i> . 2014 | AATGATACGGCGACCACCGAG                                       |
| CYM-MWS21-1 | Reverse primer to amplify adaptor-ligated genomic fragment, with TruSeq index sequence 1                        | CAAGCAGAAGACGGCATAACGAGATATCACGGTGACTGGAGTTCAGACGTGTGC      |
| CYM-MWS21-2 | Reverse primer to amplify adaptor-ligated genomic fragment, with TruSeq index sequence 2                        | CAAGCAGAAGACGGCATAACGAGATCGATGTGTGACTGGAGTTCAGACGTGTGC      |
| CYM-MWS21-3 | Reverse primer to amplify adaptor-ligated genomic fragment, with TruSeq index sequence 3                        | CAAGCAGAAGACGGCATAACGAGATTTAGGCGTGACTGGAGTTCAGACGTGTGC      |
| CYM-MWS21-4 | Reverse primer to amplify adaptor-ligated genomic fragment, with TruSeq index sequence 4                        | CAAGCAGAAGACGGCATAACGAGATTGACCAGTGACTGGAGTTCAGACGTGTGC      |
| GG424       | For cloning pJTR127 (amplifies <i>cas</i> genes from pJTR126, R)                                                | CATATTGCCTGATGAAGTGAATAG                                    |
| GG425       | For cloning pJTR127 (amplifies gp43 spacer from pWJ191, R)                                                      | CTATTCACTTCATCAGGCAATATG                                    |
| W614        | For cloning pJTR127 (amplifies <i>cas</i> genes from pJTR126, F)                                                | GGTTATACTAAAAGTCGTTTGTGG                                    |
| W852        | For cloning pJTR127 (amplifies gp43 spacer from pWJ191, F)                                                      | CCAACAAACGACTTTTAGTATAACC                                   |
| W915        | Forward primer for qPCR amplification of <i>S. aureus rho</i> gene                                              | GTCAATGACCATAACGCAGAAG                                      |
| W916        | Reverse primer for qPCR amplification of <i>S. aureus rho</i> gene                                              | CAATCGGTGTTACTAAATCCATG                                     |
| W1051       | For cloning gp14 spacer into pJTR116 backbone                                                                   | GAACCTACGTCCGTAATGCTAGGATTTGCAAATTTCTTA                     |
| W1052       | For cloning gp14 spacer into pJTR116 backbone                                                                   | GATCTAAGAAATTTGCAAATCCTAGCATTACGGACGTAG                     |
| NP112       | Primer to amplify the GFP coding sequence from pCN54                                                            | TCCAGATCTTCTTCAGGTTATGACCATGTCACTTTGCTTGATATATGAG           |
| NP114       | Primer to amplify pLZ12spec                                                                                     | TGGTCATAACCTGAAGGAAGATCTG                                   |
| AV119       | Primer to amplify pLZ12spec                                                                                     | CAGGAAACAGCTATGACCATGATTAC                                  |
| AV129       | Primer to amplify the promoter from the SOS-responsive gene 4-oxalocrotonate tautomerase                        | ATGGTCATAGCTGTTTCTGTCAATTATTAATTTGAGTATATCATGTAATAC         |
| AV130       | Primer to amplify the promoter from the SOS-responsive gene 4-oxalocrotonate tautomerase                        | AGTTCTTCTCCTTACTCATTGTATTTCTCCCTTACTTGAATC                  |
| AV131       | Primer to amplify the GFP coding sequence from pCN54                                                            | ATGAGTAAAGGAGAAGAAGACTTTTC                                  |
| oDVB146     | BsaI Cloning in pDVB47 Sau type II-A CRISPR, spacer targeting phiNM1 gp12                                       | AGACGCGAAATCATACGCAAAAATATTCATGTTAG                         |
| oDVB147     | BsaI Cloning in pDVB47 Sau type II-A CRISPR, spacer targeting phiNM1 gp12                                       | AAAACATACATGAATATTTTTCGATGATTTTCGC                          |

|         |                                                                                      |                                                                                            |
|---------|--------------------------------------------------------------------------------------|--------------------------------------------------------------------------------------------|
| JTR1008 | Forward primer for qPCR of <i>S. aureus umuC</i> gene                                | CGAGTGTTTCTTGTATTGAAAAGGGC                                                                 |
| JTR1009 | Reverse primer for qPCR of <i>S. aureus umuC</i> gene                                | GTGGTATTTCAAACAATCGCGACCC                                                                  |
| B585    | Amplification of pDB114 backbone for construction of pDB236                          | GGAGAGGCGTATCATCAAACGAAAATTGGATAAAGTGGG                                                    |
| B586    | Amplification of pDB114 backbone for construction of pDB236                          | TATTTTATTATGCATCGTTTGTGAACTAATGGGTGC                                                       |
| B587    | Amplification of type II-A CRISPR-cas locus of <i>S. aureus</i> M06/0171 into pDB236 | TTAGTTCAACAACGATGCATAATAAAATACAGGTCC                                                       |
| B588    | Amplification of type II-A CRISPR-cas locus of <i>S. aureus</i> M06/0171 into pDB236 | TCCAATTTTCGTTTGATGATACGCCCTCTCCCTATCAGTG                                                   |
| oDVB96  | Amplification of pDB236 fragment to replace the CRISPR array for a Bsal cloning site | AGCATTTTCAGGTATAGGTGTTTTGGGAAACAATTTCCCGAACCATTTATATTCTCTAC                                |
| oDVB97  | Amplification of pDB236 fragment to replace the CRISPR array for a Bsal cloning site | TTTCCCAAACACCTATACCTGAAAATGCTTTTCTCTTTCTATTATCCATGACTTCA                                   |
| oDVB126 | Amplification of pDB236 fragment to replace the CRISPR array for a Bsal cloning site | TGAAAAAATTAAGCTGCACGATATGCAAGAAGGGAAATGTTTATACTCGTTAG AAGCAAT                              |
| oDVB127 | Amplification of pDB236 fragment to replace the CRISPR array for a Bsal cloning site | GAGACTTTGAGCTTCCGAGACTGGTCTCAGTCTACCTCATACTAAAATTAC AGAGTACTAAAACCTCTAGCATCATTATAAATCCTCA  |
| oDVB128 | Amplification of pDB236 fragment to replace the CRISPR array for a Bsal cloning site | TGAGACCAGTCTCGGAAGCTCAAAGGTCTCGTTTTAGTACTCTGTAATTTTAG GTATGAGGTAGACAGCAAATCACTGATAGGGAGAGG |
| oDVB129 | Amplification of pDB236 fragment to replace the CRISPR array for a Bsal cloning site | TCTTGCATATCGTGCAGCTTAATTTTTTCAATTAATATTTAGCATTTTCTTT ACCTGTC                               |

### Supplementary methods table 3. Plasmids used in this study

| Plasmid                         | Description                                                                                                                                                                        | Source or reference |
|---------------------------------|------------------------------------------------------------------------------------------------------------------------------------------------------------------------------------|---------------------|
| pGG-BsaI ( $\Delta$ spc)        | type III-A CRISPR-Cas with a BsaI cloning site inserted between the first and second repeats, used as a non-targeting spacer control                                               | 1                   |
| pWJ245 (gp14)                   | type III-A CRISPR-Cas with a spacer targeting the <i>gp14</i> gene of $\phi$ NM1 $\gamma$ 6                                                                                        | 2                   |
| pWJ248 (gp14, dCsm3/dCsm6)      | type III-A CRISPR-Cas with a spacer targeting the <i>gp14</i> gene of $\phi$ NM1 $\gamma$ 6 and <i>csm3</i> (D32A), <i>csm6</i> (R364A,H369A) mutations                            | 2                   |
| pJTR122 (gp14, dHD/dCsm3)       | type III-A CRISPR-Cas with a spacer targeting the <i>gp14</i> gene of $\phi$ NM1 $\gamma$ 6 and <i>cas10</i> (H14A, D15A) and <i>csm3</i> (D32A) mutations                         | This study          |
| pWJ191 (gp43)                   | type III-A CRISPR-Cas with a spacer targeting the <i>gp43</i> gene of $\phi$ NM1 $\gamma$ 6                                                                                        | 2                   |
| pJTR109 (gp43, dHD)             | type III-A CRISPR-Cas with a spacer targeting the <i>gp43</i> gene of $\phi$ NM1 $\gamma$ 6 and <i>cas10</i> (H14A, D15A) mutations                                                | 3                   |
| pWJ242 (gp43, dCsm3/dCsm6)      | type III-A CRISPR-Cas with a spacer targeting the <i>gp43</i> gene of $\phi$ NM1 $\gamma$ 6 and <i>csm3</i> (D32A), <i>csm6</i> (R364A,H369A) mutations                            | 2                   |
| pJTR127 (gp43, dHD/dCsm3/dCsm6) | type III-A CRISPR-Cas with a spacer targeting the <i>gp43</i> gene of $\phi$ NM1 $\gamma$ 6 and <i>cas10</i> (H14A, D15A), <i>csm3</i> (D32A), <i>csm6</i> (R364A,H369A) mutations | This study          |
| pWJ153                          | pE194-based plasmid vector with an inducible P <sub>tet</sub> promoter, used as a non-targeting spacer control                                                                     | 1                   |
| pJTR162                         | pE194-based plasmid with a target sequence matching the <i>gp43</i> spacer under the control of the P <sub>tet</sub> promoter                                                      | 3                   |
| pDVB51 (pSauCas9)               | Type II-A CRISPR-Cas system of <i>S. aureus</i> with a spacer targeting <i>gp12</i> in $\phi$ NM1 $\gamma$ 6.                                                                      | This study          |
| pAV22                           | SOS reporter plasmid with Green Fluorescent Protein (GFP) under the control of the 4-oxalocrotonate tautomerase promoter of <i>S. aureus</i> .                                     | This study          |

### References

- 1 Goldberg, G. W., Jiang, W., Bikard, D. & Marraffini, L. A. Conditional tolerance of temperate phages via transcription-dependent CRISPR-Cas targeting. *Nature* **514**, 633-637.
- 2 Jiang, W., Samai, P. & Marraffini, L. A. Degradation of phage transcripts by CRISPR-associated RNases enables type III CRISPR-Cas immunity. *Cell* **164**, 710-721.
- 3 Rostol, J. T. & Marraffini, L. A. Non-specific degradation of transcripts promotes plasmid clearance during type III-A CRISPR-Cas immunity. *Nat Microbiol* **4**, 656-662.
