# Supplementary material
Source: PubMed Central journal article supplement (PMC8820005)

**a**

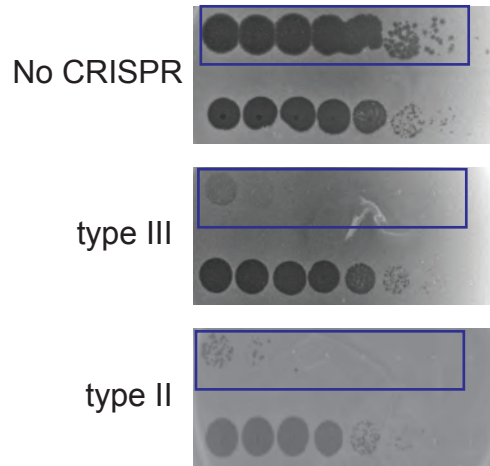

**b**

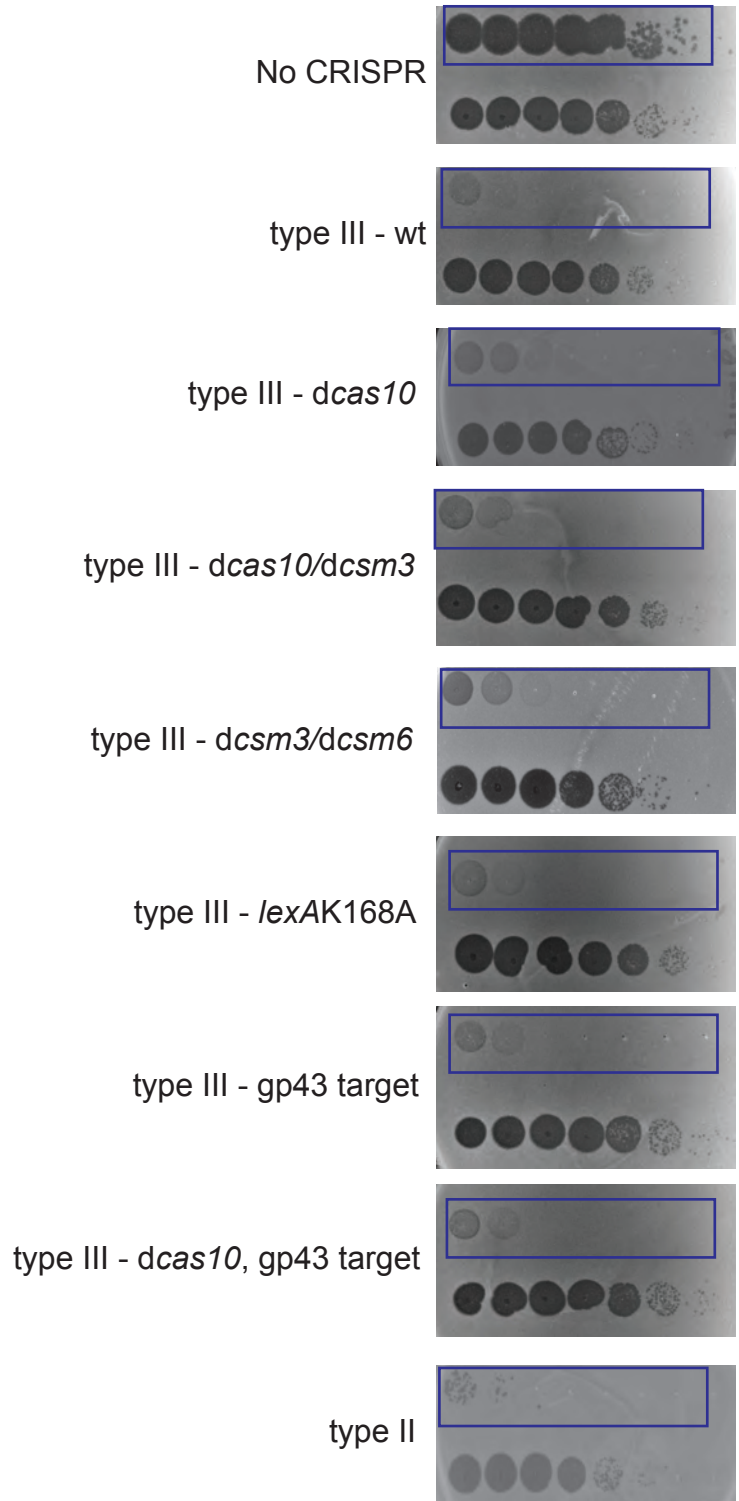

**C**

*dcsm3/dcsm6* + pTarget

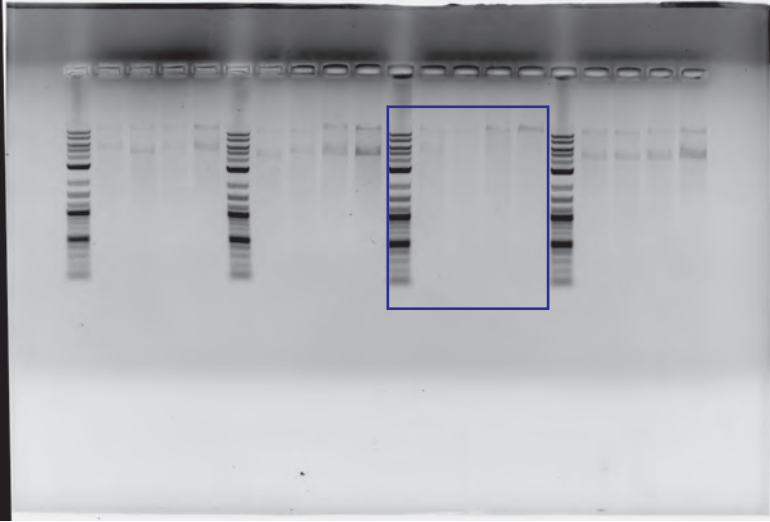

*dcas10/dcsm3/dcsm6* + pTarget

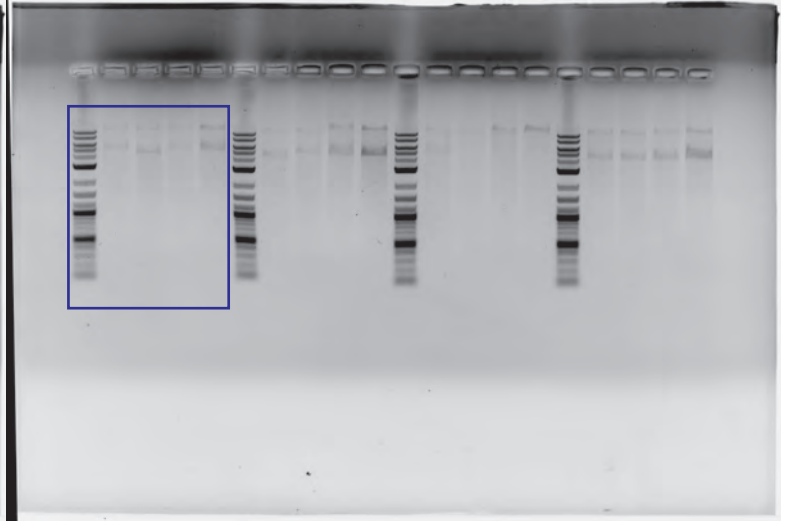

*dcsm3/dcsm6* + pControl

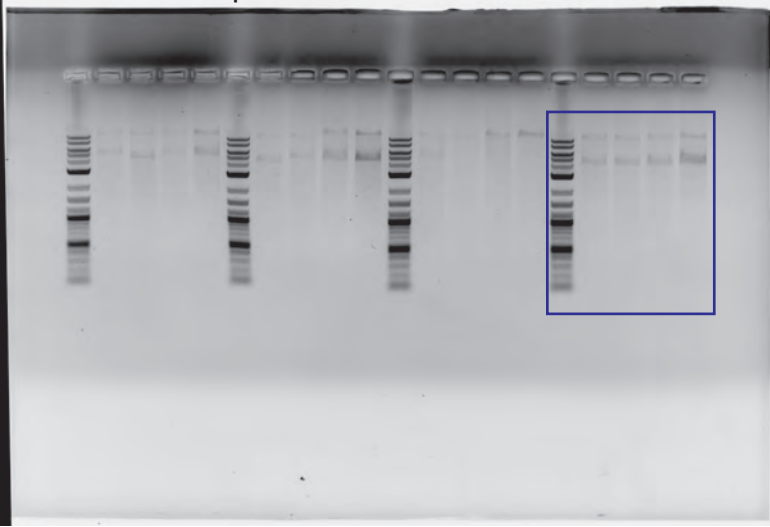

*dcas10/dcsm3/dcsm6* + pControl

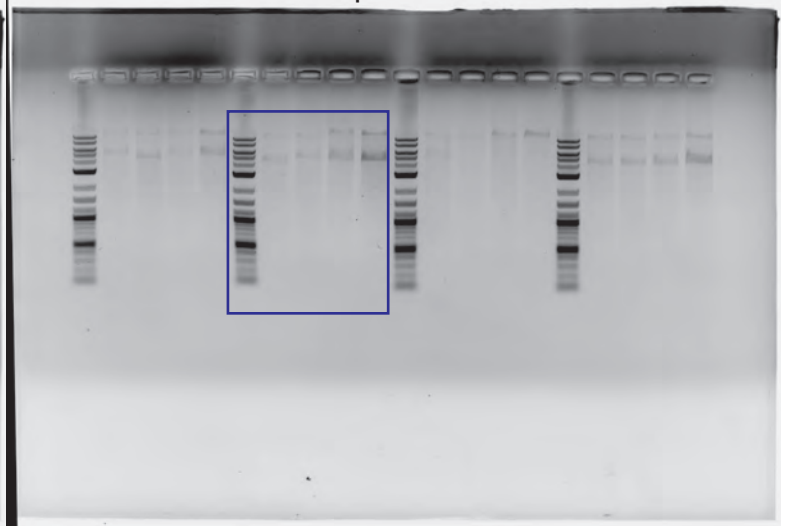

**d**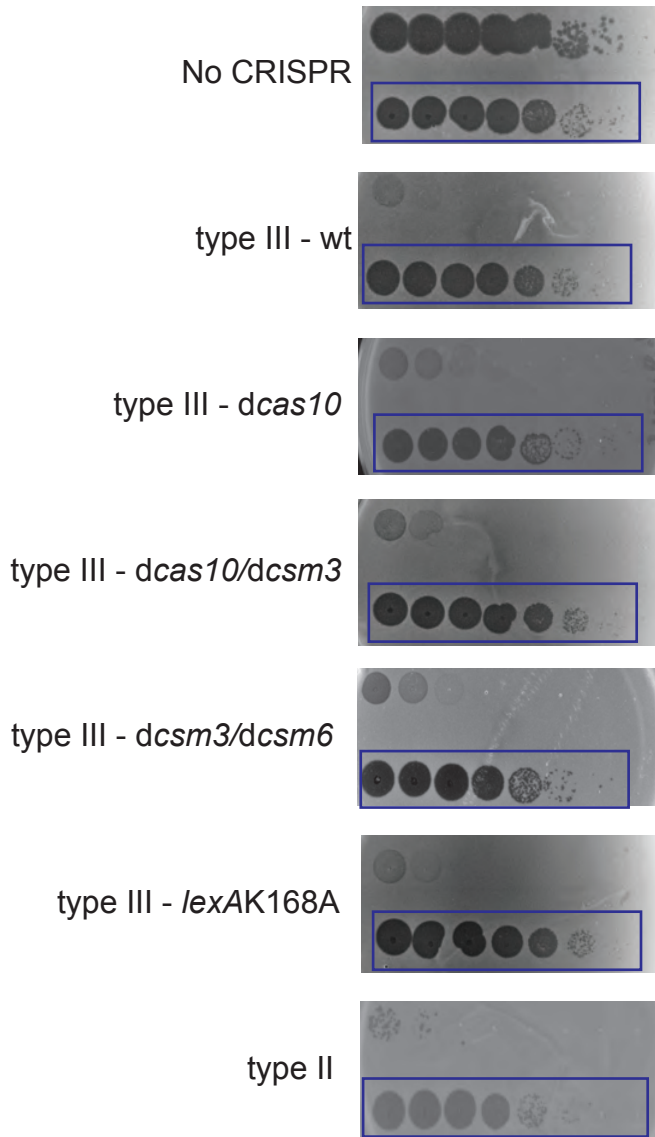**e**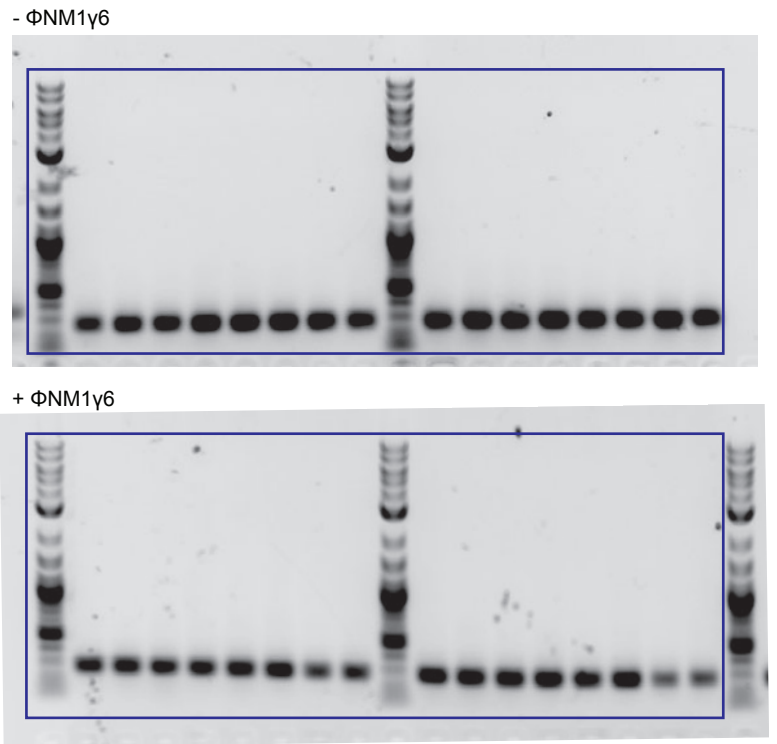

Supplement: NIHMS1770985-supplement-Suppl_Fig_1.pdf [file NIHMS1770985-supplement-Suppl_Fig_1.pdf]
